# Supplementary material for: Two doses of the mRNA BNT162b2 vaccine reduce severe outcomes, viral load and secondary attack rate: evidence from a SARS-CoV-2 Alpha outbreak in a nursing home in Germany, January-March 2021
Source: bioRxiv or medRxiv preprint supplement (doi:10.1101/2021.09.13.21262519), 2021-09-23

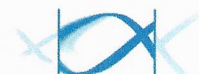

Robert Koch Institute | Seestrasse 10 | 13353 Berlin

Department for Infectious Disease  
Epidemiology

To whom it may concern

Dr. Osamah Hamouda

**Two doses of the mRNA BNT162b2 vaccine reduce severe outcomes, viral load and secondary attack rate: evidence from a SARS-CoV-2 Alpha outbreak in a nursing home, Osnabrück, Germany, January-March 2021**

26.08.2021

As head of the Department for Infectious Disease Epidemiology at the Robert Koch Institute (RKI), the national Public Health Institute of Germany, I hereby certify that:

Robert Koch Institute  
zentrale@rki.de  
Tel.: +49 (0)30 18754-0  
Fax: +49 (0)30 18754-2328  
www.rki.de

The outbreak investigation presented by Meyer et al. in "**Two doses of the mRNA BNT162b2 vaccine reduce severe outcomes, viral load and secondary attack rate: evidence from a SARS-CoV-2 Alpha outbreak in a nursing home, Osnabrück, Germany, January-March 2021**" was conducted as part of the official tasks of the local public health authorities of the respective district, supported by the RKI upon official request in accordance to §4 of the German Protection against Infection Act. Therefore, this investigation was exempt from additional institutional review.

Reporting/  
Processing by: M. Meyer

Extension: -5215  
E-Mail: meyere@rki.de

Address:  
Seestrasse 10  
13353 Berlin  
Germany

Sincerely,

Dr. Osamah Hamouda

Head of Department for Infectious Disease Epidemiology

Robert Koch Institute

The Robert Koch Institute  
is a federal institute  
within the portfolio of the  
Federal Ministry of Health

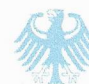

Supplement: Supplementary file [file media-1.pdf]
